# Supplementary material for: Assessing the Impact of Solar Climate Intervention on Future U.S. Weather Using a Convection-Permitting WRF Model
Source: Copernicus journal article supplement (doi:10.5194/egusphere-2025-3490), 2025-07-29
Supplement: Supplementary file 1 [file egusphere-2025-3490-supplement.pdf]

1 *Supplement of*

2 **Assessing the Impact of Solar Climate Intervention on Future U.S.**  
3 **Weather Using a Convection-Permitting WRF Model**

4 **Lantao Sun<sup>1\*</sup>, James W. Hurrell<sup>1</sup>, Kristen L. Rasmussen<sup>1</sup>, Bali Summers<sup>1</sup>, Erin A. Sherman<sup>1</sup>, Ben Kravitz<sup>2,3</sup>**

5 <sup>1</sup>Department of Atmospheric Science, Colorado State University, Fort Collins, CO, USA

6 <sup>2</sup>Department of Earth and Atmospheric Sciences, Indiana University Bloomington, Bloomington, IN, USA

7 <sup>3</sup>Atmospheric, Climate, and Earth Sciences Division, Pacific Northwest National Laboratory, Richland, WA, USA

8 *Correspondence to:* Lantao Sun ([lantao.sun@rams.colostate.edu](mailto:lantao.sun@rams.colostate.edu))

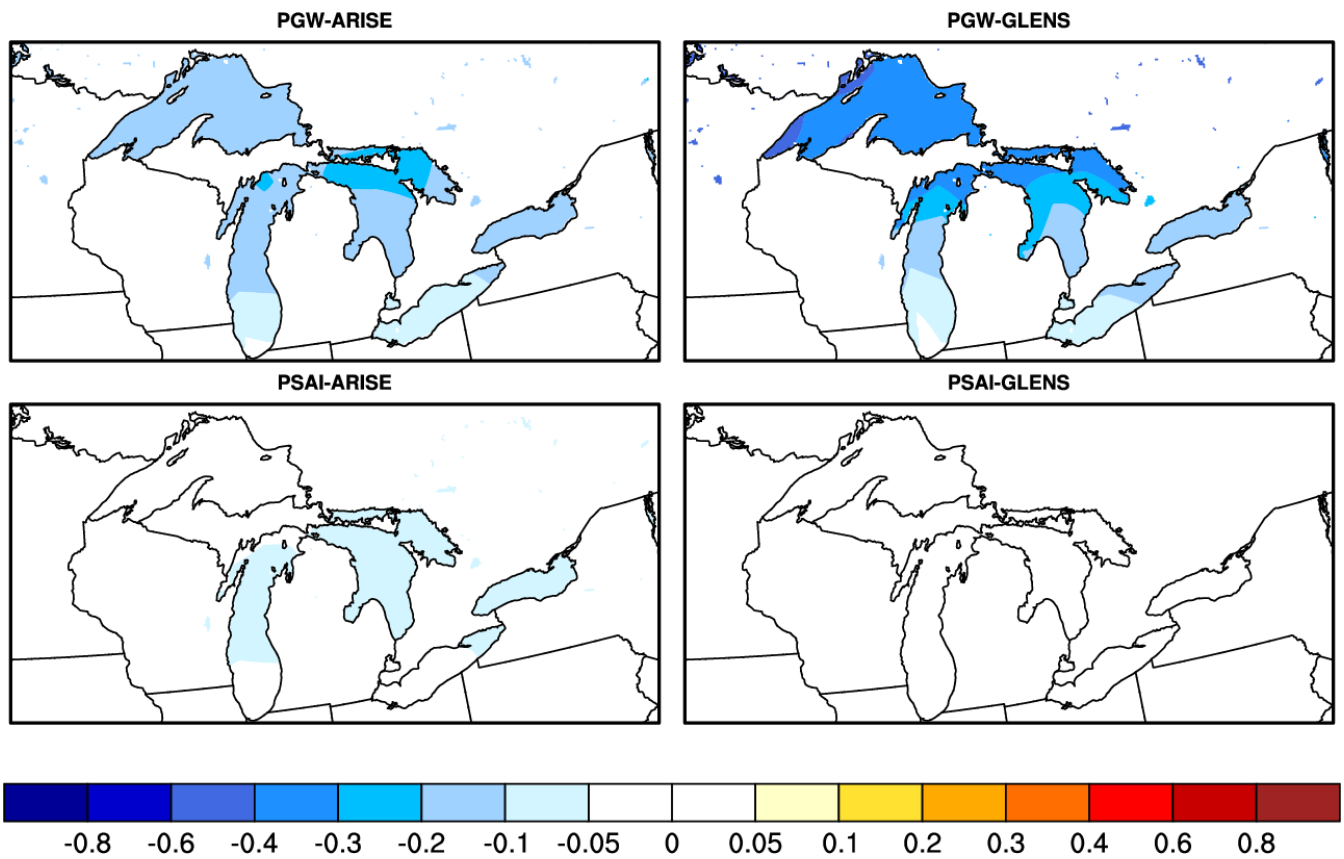

9                    -0.8   -0.6   -0.4   -0.3   -0.2   -0.1   -0.05   0   0.05   0.1   0.2   0.3   0.4   0.6   0.8

10   **Figure S1:** Prescribed delta lake ice concentration used in the WRF PGW and PSAI simulations.

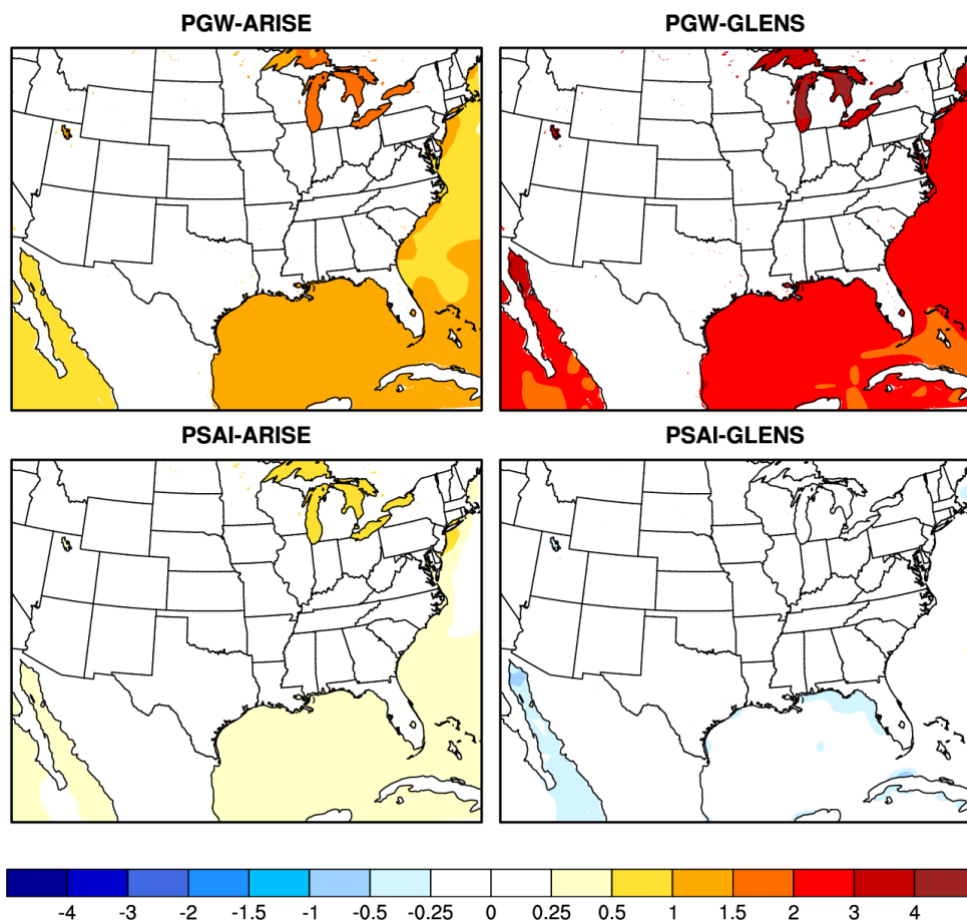

11

12 **Figure S2:** Prescribed delta sea-surface temperature and lake temperature (unit of °C) in the WRF PGW and PSAI simulations.
